# Supplementary material for: An immobilized dehydrohalogenase based potentiometric biosensor for the detection of chlorinated pesticides
Source: Royal Society of Chemistry journal article supplement (doi:10.1039/c0ay00272k), 2010-01-01
Supplement: c0ay00272k.pdf [file c0ay00272k.pdf]

**Supplementary material**

**An immobilized dehydrohalogenase based potentiometric biosensor for the detection of chlorinated pesticides**

**Mahadevu Rajashekara Murthy, Iychettira Machaiah Mandappa<sup>1</sup>, Rangachary Latha, Aaydha Chidambara Vinayaka, Munna Singh Thakur\* and Haravey Krishnan Manonmani**

Fermentation Technology and Bioengineering Department

<sup>1</sup>Food Safety and Analytical Quality Control Laboratory

Central Food Technological Research Institute (A constituent laboratory of Council of Scientific and Industrial Research, New Delhi), Mysore – 570 020, India.

\*Correspondence to

M.S.Thakur

Fermentation Technology and Bioengineering Department

Central Food Technological Research Institute, Mysore 570 020, India

Phone: +91-821-2515792

Fax: +91-821-2517233

E-mail: [msthakur@cftri.res.in](mailto:msthakur@cftri.res.in), [msthakur@yahoo.com](mailto:msthakur@yahoo.com)

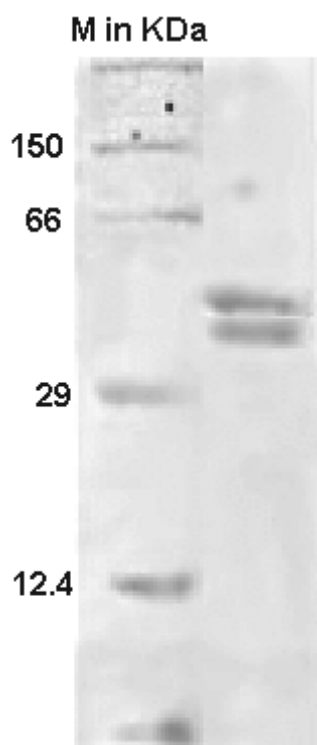

**Fig. 1S** SDS PAGE showing the mobility of purified DDT dehydrohalogenase enzyme along with molecular markers.

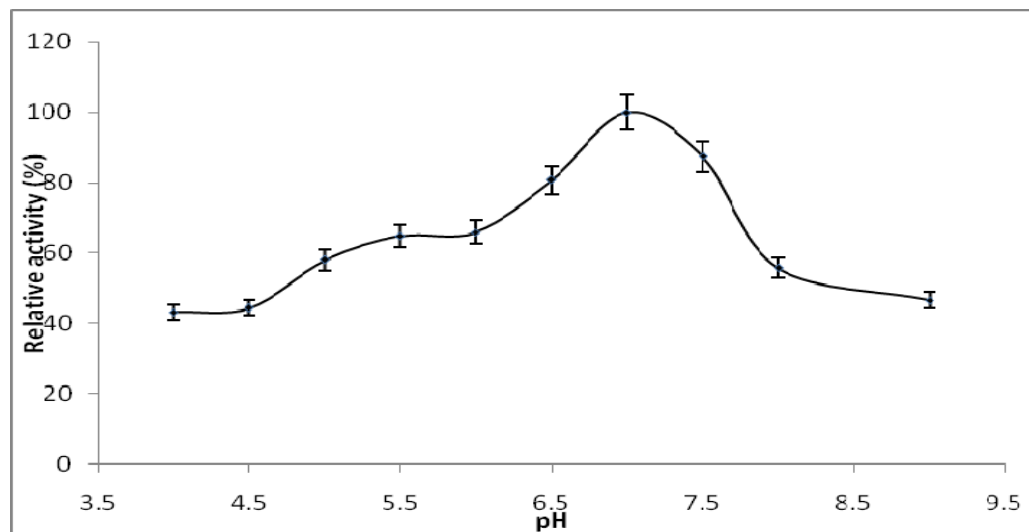

**Fig. 2S** Effect of pH on the activity of DDT dehydrohalogenase enzyme (n=3).

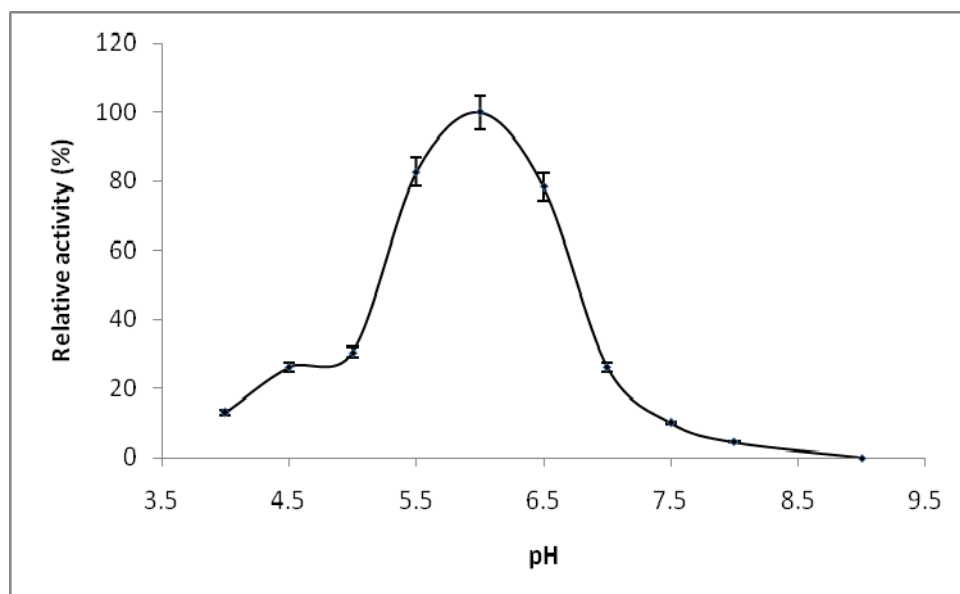

**Fig. 3S** Studies on effect of pH on the activity of HCH dehydrohalogenase enzyme (n=3).

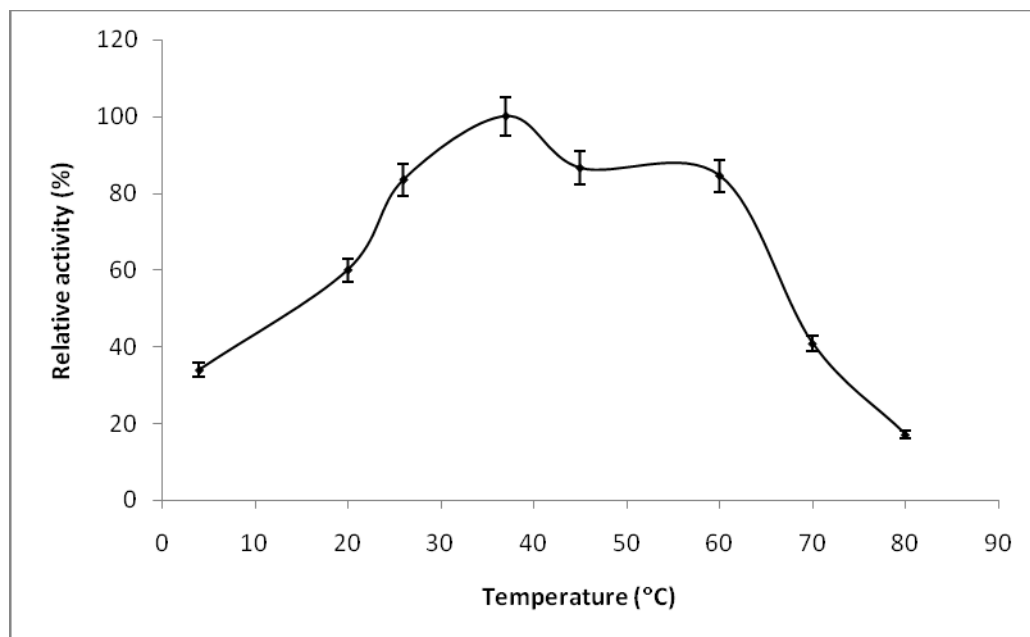

**Fig. 4S** Studies on the effect of temperature on the activity of DDT dehydrohalogenase enzyme (n=3).

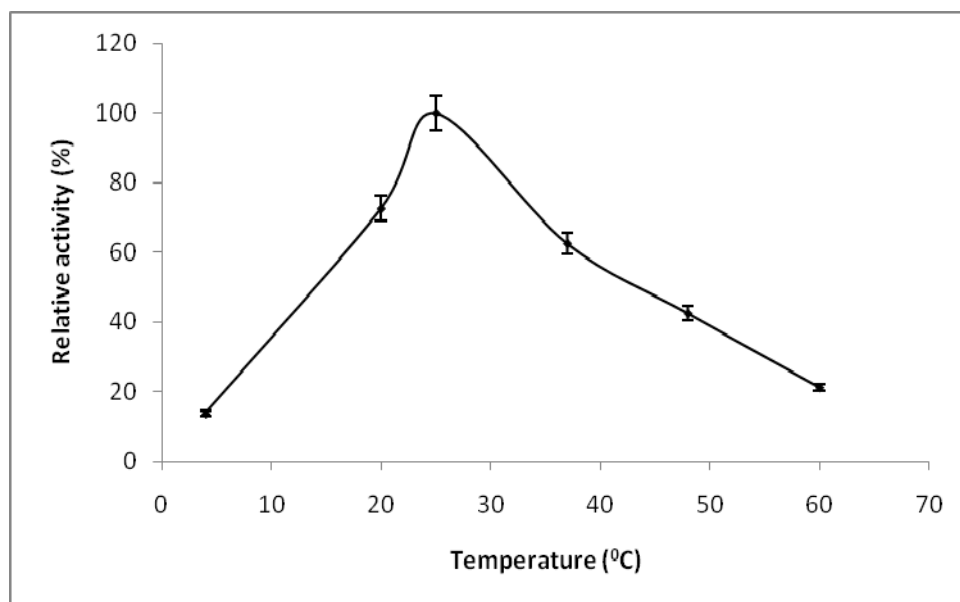

**Fig. 5S** Studies on the effect of temperature on the activity of HCH dehydrohalogenase enzyme (n=3).
